# Supplementary material
Source: PubMed Central journal article supplement (PMC6395520)
Supplement: NIHMS1516811-supplement-3.pdf [file NIHMS1516811-supplement-3.pdf]

**Supplementary Table 1. List of adRNA and gRNA antisense sequences.**

| Name              | adRNA/gRNA antisense sequence (5' to 3')                        |
|-------------------|-----------------------------------------------------------------|
| mOTC <sup>†</sup> | ACAAAC <u>C</u> GAGCGGTGTCTGT                                   |
| mDMD <sup>†</sup> | GCCATT <u>CC</u> ATTGCTCTTTCA                                   |
| RAB7A (20, 6)     | TGCCGC <u>C</u> AGCTGGATTTC                                     |
| CCNB1 (20, 6)     | CTGTAC <u>C</u> AGCCAGTCAATTA                                   |
| DAXX (20, 6)      | CTTCTC <u>C</u> ACAGCCCGAAGCA                                   |
| CKDN2 (20, 6)     | CTCCTC <u>C</u> ACCCGACCCCGGG                                   |
| GAPDH (20, 6)     | GGGTGC <u>C</u> AAGCAGTTGGTGG                                   |
| ALDOA (20, 6)     | CTTGT <u>C</u> ACCTTGATGCCCA                                    |
| ARHGAP8 (20, 6)   | TTCATC <u>C</u> AATGGCTGGTTAT                                   |
| CKB (20, 6)       | CAAGGC <u>C</u> AAGGGCTCGCCAG                                   |
| KRAS (20, 6)      | TCCAAC <u>C</u> ACCACAAGTTTAT                                   |
| Cas13b_RAB7A      | TACAGAATACTGCCGC <u>C</u> AGCTGGATTTC                           |
| Cas13b_mOTC       | GAAAAGTTTTACAAAC <u>C</u> GAGCGGTGTCTGTGAGACTTTCATTACACCCA      |
| Cas9_mDMD_1       | ATAATTTCTATTATATTACA                                            |
| Cas9_mDMD_2       | ATTTACAGGTAAGCCGAGGTT                                           |
| RAB7A (20, 10)    | ATACTGCCGC <u>C</u> AGCTGGATT                                   |
| RAB7A (60, 6)     | TGCCGC <u>C</u> AGCTGGATTTC                                     |
| RAB7A (60, 30)    | TCTTGTGTCTACTGTACAGAATACTGCCGC <u>C</u> AGCTGGATTTC             |
| RAB7A (100, 6)    | TGCCGC <u>C</u> AGCTGGATTTC                                     |
| RAB7A (100, 50)   | TGATAAAAGGCGTACATAATTCTTGTGTCTACTGTACAGAATACTGCCGC <u>C</u> AGC |
| KRAS (100, 50)    | TGAATTAGCTGTATCGTCAAGGCACTCTTGCCACGCCACCAGCTCCAAC <u>C</u> AC   |
| CKB (100, 50)     | ATCAAAAAATAAACTCTACCAAGGGTGACGGAAGTCTCTACAGCAAGGC <u>C</u> AA   |

<sup>†</sup>mOTC and mDMD refer to mouse mRNA targets.

**Supplementary Table 2. List of primers for next generation sequencing (NGS) analyses.**

| Name                              | Sequence (5' to 3')              |
|-----------------------------------|----------------------------------|
| mDMD_NGS_F <sup>†</sup>           | CTCTCTGTACCTTATCTTAGTGTTACTGA    |
| mDMD_NGS_R <sup>†</sup>           | ATTTCTGGCATATTTCTGAAGGTG         |
| mOTC_NGS_F <sup>†</sup>           | ACCCTTCCTTTCTTACCACACA           |
| mOTC_spliced_NGS_R <sup>†</sup>   | CAGGGTGTCCAGATCTGATTGTT          |
| mOTC_unspliced_NGS_R <sup>†</sup> | CTTCTCTTTTAAACTAACCCATCAGAGTT    |
| CCNB1_NGS_F                       | CAAGCAGTCAGACCAAATACCTACTG       |
| CCNB1_NGS_R                       | TCTTAGCATGCTTCGATGTGGCATA        |
| DAXX_NGS_F                        | CATCAACAAGCCAGGGCCTG             |
| DAXX_NGS_R                        | GAAGAGGAAATGTCCGTCTCCAC          |
| RAB7A_NGS_F                       | AGGCCTGTAAGGTGGAGGG              |
| RAB7A_NGS_R                       | TGAAATAACGGCAATTTATCCATTGCACATAC |
| CDKN2A_NGS_F                      | GGGAGCAGCATGGAGCCTT              |
| CDKN2A_NGS_R                      | TCCGACCGTAACTATTCGGTGC           |
| GAPDH_NGS_F                       | TGGGTGTGAACCATGAGAAGTAT          |
| GAPDH_NGS_R                       | TGGCATGGACTGTGGTCATG             |
| CKB_NGS_F                         | CCTAACTTATTGCCTGGGCAGTG          |
| CKB_NGS_R                         | GCATCAGCAGTATCTTAGCCATCAA        |
| NGS_KRAS_F                        | CAGAGGCTCAGCGGCTCC               |
| NGS_KRAS_R                        | TAGCTGTATCGTCAAGGCACTC           |
| ARHGAP8_NGS_F                     | CACACCTGTCTGTGCACTTGTA           |
| ARHGAP8_NGS_R                     | CGGTCCACAGCTCAGGAACC             |
| ALDOA_NGS_F                       | ACCAGAAGGCGGATGATGGG             |
| ALDOA_NGS_R                       | CTCAGACAGCCCATCCAACC             |
| KRAS_NGS_R2                       | TACTACTTGCTTCCTGTAGGAATCCTC      |
| CKB_NGS_F2                        | AGCCCTGCTGCTTCCTAACTT            |
| CKB_NGS_R2                        | ACCCTAGTTTATTTTCAGCATCAGCAG      |

<sup>†</sup>mOTC and mDMD refer to mouse mRNA targets.

**Supplementary Table 3. Tallies of RNA-seq reads from high-throughput sequencing experiments.** Tallies of RNA-seq reads from high-throughput sequencing experiments. The given counts represent read mates, not read pairs, from paired end sequencing. Columns are: **sn**, sample name; **nt**, total number of raw reads after demultiplexing; **nu**, number of reads in pairs uniquely aligned to the reference genome; **nd**, number of reads in duplicated pairs; **nr**, number of remaining reads; **df**, down-sampling fraction (see **Methods**). Samples named “293T”, “293T L2”, “293T L8”, and “293T L4” were taken from the same control library but were sequenced on different lanes of the Illumina instrument.

| sn                                   | nt         | nu         | nd        | nr         | df       |
|--------------------------------------|------------|------------|-----------|------------|----------|
| 293T L1 (0)                          | 108434072  | 86792552   | 21376362  | 65416190   | 0.474401 |
| 293T (1)                             | 107737550  | 86652062   | 21362310  | 65289752   | 0.47532  |
| MCP-ADAR1 DD-NES -adRNA (2)          | 75469304   | 57715184   | 11907804  | 45807380   | 0.677479 |
| MCP-ADAR1 DD-NES +adRNA (3)          | 76113978   | 55714058   | 11591434  | 44122624   | 0.703347 |
| MCP-ADAR1 DD-NLS -adRNA (4)          | 96485146   | 79023222   | 17911404  | 61111818   | 0.507815 |
| MCP-ADAR1 DD-NLS +adRNA (5)          | 70684382   | 56425658   | 8656076   | 47769582   | 0.64965  |
| MCP-ADAR1 DD (E1008Q)-NES -adRNA (6) | 73073334   | 54369950   | 10484274  | 43885676   | 0.707145 |
| MCP-ADAR1 DD (E1008Q)-NES +adRNA (7) | 95946852   | 71154174   | 18408668  | 52745506   | 0.588363 |
| MCP-ADAR1 DD (E1008Q)-NLS -adRNA (8) | 54654264   | 43441234   | 6314734   | 37126500   | 0.835886 |
| MCP-ADAR1 DD (E1008Q)-NLS +adRNA (9) | 78346400   | 59725272   | 11074654  | 48650618   | 0.637886 |
| MCP-ADAR2 DD-NES -adRNA (10)         | 89534306   | 74166552   | 14629650  | 59536902   | 0.521249 |
| MCP-ADAR2 DD-NES +adRNA (11)         | 80859886   | 66904932   | 12911706  | 53993226   | 0.574767 |
| MCP-ADAR2 DD (E488Q)-NES -adRNA (12) | 79769278   | 65570598   | 11792520  | 53778078   | 0.577066 |
| MCP-ADAR2 DD (E488Q)-NES +adRNA (13) | 98084994   | 80214200   | 20639602  | 59574598   | 0.520919 |
| MCP-ADAR2 DD-NLS -adRNA (14)         | 75862216   | 60748320   | 14040780  | 46707540   | 0.664422 |
| MCP-ADAR2 DD-NLS +adRNA (15)         | 80473694   | 66106146   | 12359830  | 53746316   | 0.577407 |
| MCP-ADAR2 DD (E488Q)-NLS -adRNA (16) | 48576248   | 40372732   | 6032488   | 34340244   | 0.903707 |
| MCP-ADAR2 DD (E488Q)-NLS +adRNA (17) | 72617598   | 58732422   | 12388120  | 46344302   | 0.66963  |
| 293T L8 (18)                         | 68191034   | 54705760   | 10254952  | 44450808   | 0.698154 |
| 293T+GFP (19)                        | 88146982   | 64109834   | 15072908  | 49036926   | 0.63286  |
| ADAR2 -adRNA (20)                    | 86641852   | 69462198   | 18251916  | 51210282   | 0.606002 |
| ADAR2 +adRNA (21)                    | 74048950   | 59010378   | 16071512  | 42938866   | 0.722737 |
| ADAR2 (E488Q) -adRNA (22)            | 81927154   | 65842936   | 16273572  | 49569364   | 0.626063 |
| ADAR2 (E488Q) +adRNA (23)            | 74616248   | 56997066   | 17856714  | 39140352   | 0.792878 |
| Cas13b-ADAR2 DD (E488Q) -gRNA (24)   | 72072754   | 54678392   | 12500074  | 42178318   | 0.73577  |
| Cas13b-ADAR2 DD (E488Q) +gRNA (25)   | 116274658  | 91188024   | 29488244  | 61699780   | 0.502976 |
| 293T L4 (26)                         | 70234868   | 56894104   | 11595590  | 45298514   | 0.685089 |
| MS2 adRNA (27)                       | 78457766   | 51176442   | 19161354  | 32015088   | 0.969341 |
| GluR2 adRNA (28)                     | 65855024   | 41791326   | 10757802  | 31033524   | 1        |
| gRNA (29)                            | 89132098   | 59288978   | 19226242  | 40062736   | 0.774623 |
| min                                  | 48576248   | 40372732   | 6032488   | 31033524   | 0.474401 |
| max                                  | 116274658  | 91188024   | 29488244  | 65416190   | 1        |
| total                                | 2588377968 | 2005961258 | 481864884 | 1524096374 | 21.68535 |

**Supplementary Table 4. Results of A->G editing yield quantification from aligned RNA-seq reads.** Results of A->G editing yield quantification from aligned RNA-seq reads. Columns are: sample name; total sites, the total number of reference sites with a significant change in A->G editing yield in at least one comparison between treatment and control sample; changed sites, the number of reference A-sites found to have a significant change in A->G editing yield when comparing the treatment to the control sample, which is the first sample in **Supplementary Table 3**; on-target editing yield, the editing yield observed at the intended target A-site within the RAB7A mRNA; median editing yield, the median yield at all sites considered except the target site.

| Sample name                       | Total sites | Changed sites | On-target editing yield | Median editing yield |
|-----------------------------------|-------------|---------------|-------------------------|----------------------|
| 293T L2                           | 382978      | 0             | 0                       |                      |
| 293T + GFP                        | 382978      | 6             | 0                       | 0.295913155          |
| gRNA                              | 382978      | 32            | 0.013333333             | 0.142102619          |
| Cas13b-ADAR2 DD (E488Q) - gRNA    | 382978      | 112853        | 0.025316456             | 0.105263158          |
| Cas13b-ADAR2 DD (E488Q) + gRNA    | 382978      | 49432         | 0.11637931              | 0.092205807          |
| GluR2 adRNA                       | 382978      | 23            | 0                       | 0.144542773          |
| ADAR2 - adRNA                     | 382978      | 5769          | 0                       | 0.157894737          |
| ADAR2 + adRNA                     | 382978      | 18573         | 0.27638191              | 0.14                 |
| ADAR2 (E488Q) - adRNA             | 382978      | 25732         | 0                       | 0.131578947          |
| ADAR2 (E488Q) + adRNA             | 382978      | 125409        | 0.268398268             | 0.150943396          |
| MS2 adRNA                         | 382978      | 19            | 0.006666667             | 0.169230769          |
| MCP-ADAR1 DD-NLS - adRNA          | 382978      | 20481         | 0.006849315             | 0.079069767          |
| MCP-ADAR1 DD-NLS + adRNA          | 382978      | 28537         | 0.159763314             | 0.084745763          |
| MCP-ADAR1 DD (E1008Q)-NLS - adRNA | 382978      | 90182         | 0                       | 0.112                |
| MCP-ADAR1 DD (E1008Q)-NLS + adRNA | 382978      | 110565        | 0.261627907             | 0.118081181          |
| MCP-ADAR1 DD-NES - adRNA          | 382978      | 116165        | 0.017142857             | 0.097222222          |
| MCP-ADAR1 DD-NES + adRNA          | 382978      | 101183        | 0.366459627             | 0.096618357          |
| MCP-ADAR1 DD (E1008Q)-NES - adRNA | 382978      | 226634        | 0.010416667             | 0.123076923          |
| MCP-ADAR1 DD (E1008Q)-NES + adRNA | 382978      | 195533        | 0.418604651             | 0.12244898           |
| MCP-ADAR2 DD-NLS - adRNA          | 382978      | 3760          | 0.006756757             | 0.056173674          |
| MCP-ADAR2 DD-NLS + adRNA          | 382978      | 4740          | 0.07                    | 0.076555024          |
| MCP-ADAR2 DD (E488Q)-NLS - adRNA  | 382978      | 28028         | 0.014778325             | 0.095238095          |
| MCP-ADAR2 DD (E488Q)-NLS + adRNA  | 382978      | 38087         | 0.113122172             | 0.098591549          |
| MCP-ADAR2 DD-NES - adRNA          | 382978      | 9489          | 0.021276596             | 0.09375              |
| MCP-ADAR2 DD-NES + adRNA          | 382978      | 20249         | 0.416216216             | 0.102564103          |
| MCP-ADAR2 DD (E488Q)-NES - adRNA  | 382978      | 35287         | 0.004672897             | 0.09929078           |
| MCP-ADAR2 DD (E488Q)-NES + adRNA  | 382978      | 42715         | 0.278350515             | 0.101351351          |
